# Supplementary material for: Crystal structure of vyacheslavite, U(PO4)(OH), solved from natural nanocrystal: a precession electron diffraction tomography (PEDT) study and DFT calculations
Source: Royal Society of Chemistry journal article supplement (doi:10.1039/c9ra03694f), 2019-01-01
Supplement: c9ra03694f1.pdf [file c9ra03694f1.pdf]

**Supplementary table S1.** Summary of data collection conditions and refinement parameters for vyacheslavite based on electron diffraction.

| Structural formula                                   | U(PO <sub>4</sub> )(OH)                                             |
|------------------------------------------------------|---------------------------------------------------------------------|
| Unit-cell parameters                                 | $a = 6.96 \text{ \AA}, b = 9.07 \text{ \AA}, c = 12.27 \text{ \AA}$ |
| $V$                                                  | $774.57 \text{ \AA}^3$                                              |
| $Z$                                                  | 8                                                                   |
| Space group                                          | <i>Cmca</i>                                                         |
| $D_{\text{calc}}$ (g cm <sup>-3</sup> )              | 6.042 (for the formula given above)                                 |
| Temperature                                          | 100 K                                                               |
| Diffractometer                                       | TEM Philips CM120                                                   |
| Radiation (wavelength)                               | electrons, (0.0335 Å)                                               |
| Resolution                                           | 0.1–0.7 Å <sup>-1</sup>                                             |
| Limiting Miller indices                              | $-9 < h < 9, -12 < k < 12, -17 < l < 17$                            |
| No. of independent reflections (obs/all) – kinematic | 433/598                                                             |
| $R_{\text{int}}$ (obs/all) – kinematic               | 0.3185/0.3760                                                       |
| Redundancy                                           | 10.784                                                              |
| No. of independent reflections (obs/all) – dynamic   | 4828/14646                                                          |
| Dynamical refinement by Jana2006                     |                                                                     |
| Reflection selection parameter                       | $R_{\text{sg}}(\text{max}) = 0.6$                                   |
| No. of reflections (obs/all)                         | 4010/9607                                                           |
| $R, wR$ (obs)                                        | 0.0888, 0.0841                                                      |
| $N$ parameters/ $N$ struct. parameters               | 295/39                                                              |

**Supplementary table S2a.** Atom positions, displacement parameters (equivalent/isotropic, in Å<sup>2</sup>) and bond-valences (in valence units, *vu*) for the crystal structure of vyacheslavite at 100 K.

| Atom | <i>x/a</i> | <i>y/b</i> | <i>z/c</i> | <i>U</i> <sub>iso</sub> (Å <sup>2</sup> ) | <i>BV</i> |
|------|------------|------------|------------|-------------------------------------------|-----------|
| U1   | 0.0        | 0.69756(9) | 0.06804(7) | 0.0219(2)                                 | 4.42(2)   |
| P1   | 0.0        | 0.5962(3)  | 0.3596(2)  | 0.0050(9)                                 | 5.03(3)   |
| O1   | 0.0        | 0.6548(5)  | 0.2470(4)  | 0.0222(17)                                | 2.21(2)   |
| O2   | 0.0        | 0.9262(6)  | 0.1374(5)  | 0.0285(19)                                | 1.96(2)   |
| O3   | 0.8284(4)  | 0.6621(3)  | 0.4247(3)  | 0.0129(10)                                | 2.15(1)   |
| O4   | 0.0        | 0.4436(7)  | 0.0940(6)  | 0.057(3)                                  | 2.35(3)   |
| H1   | 0.0        | 0.431      | 0.160      | 0.038*                                    | 1.38(2)   |

\**U*<sub>iso</sub> set to 1.2\**U*<sub>iso</sub> of the O4 atom.

**Supplementary table S2b.** Anisotropic displacement parameters (in Å<sup>2</sup>) for the structure of vyacheslavite at 100K.

|    | <i>U</i> <sup>11</sup> | <i>U</i> <sup>22</sup> | <i>U</i> <sup>33</sup> | <i>U</i> <sup>12</sup> | <i>U</i> <sup>13</sup> | <i>U</i> <sup>23</sup> |
|----|------------------------|------------------------|------------------------|------------------------|------------------------|------------------------|
| U1 | 0.0180(4)              | 0.0258(4)              | 0.0218(4)              | 0                      | 0                      | 0.0018(6)              |
| P1 | 0.0036(14)             | 0.0065(15)             | 0.0049(16)             | 0                      | 0                      | 0.0002(13)             |
| O1 | 0.020(3)               | 0.028(3)               | 0.018(3)               | 0                      | 0                      | 0.000(3)               |
| O2 | 0.048(3)               | 0.006(3)               | 0.031(3)               | 0                      | 0                      | 0.008(3)               |
| O3 | 0.0101(15)             | 0.0153(18)             | 0.0132(16)             | 0.0009(11)             | 0.0027(16)             | -0.0074(17)            |
| O4 | 0.040(4)               | 0.037(4)               | 0.093(7)               | 0                      | 0                      | -0.015(4)              |

**Supplementary table S3a.** Positions of H atoms from DFT (structure relaxed to the ground state).

| Lattice (Å) |            | 6.871    | 8.9181   | 12.2203  |
|-------------|------------|----------|----------|----------|
|             |            | <i>x</i> | <i>y</i> | <i>z</i> |
| H1 - DFT    | 8 <i>f</i> | 0.0      | 0.3993   | 0.1677   |
| H1 - vdW    | 8 <i>f</i> | 0.0      | 0.3991   | 0.1680   |

**Supplementary table S3b.** Symmetry constraint relaxation of all atomic positions for fixed experimental lattice at the DFT+U level of theory.

| Lattice (Å) |             | 6.871    | 8.9181   | 12.2203  |
|-------------|-------------|----------|----------|----------|
| Atom        |             | <i>x</i> | <i>y</i> | <i>z</i> |
| U1          | 8 <i>f</i>  | 0.0      | 0.6903   | 0.0669   |
| P1          | 8 <i>f</i>  | 0.0      | 0.5898   | 0.3613   |
| O1          | 8 <i>f</i>  | 0.0      | 0.6685   | 0.2517   |
| O2          | 8 <i>f</i>  | 0.0      | 0.9216   | 0.1525   |
| O3          | 16 <i>g</i> | 0.8264   | 0.6462   | 0.4322   |
| O4          | 8 <i>f</i>  | 0.0      | 0.4342   | 0.0982   |
| H1          | 8 <i>f</i>  | 0.0      | 0.3954   | 0.1734   |

**Supplementary table S3b.** Selected interatomic distances (in Å) and hydrogen bond geometry in the structure of vyacheslavite at 100K.

|                          |            |                       |              |                |
|--------------------------|------------|-----------------------|--------------|----------------|
| U1–O1                    | 2.230(5)   | P1–O1                 | 1.480(6)     |                |
| U1–O2                    | 2.241(5)   | P1–O2 <sup>vi</sup>   | 1.542(6)     |                |
| U1–O3 <sup>i</sup>       | 2.478(3)   | P1–O3                 | 1.557(3)     |                |
| U1–O3 <sup>ii</sup>      | 2.311(3)   | P1–O3 <sup>vii</sup>  | 1.557(3)     |                |
| U1–O3 <sup>iii</sup>     | 2.311(3)   | <P1–O>                | 1.53         |                |
| U1–O3 <sup>iv</sup>      | 2.478(3)   |                       |              |                |
| U1–O4                    | 2.325(6)   |                       |              |                |
| U1–O4 <sup>v</sup>       | 2.364(7)   |                       |              |                |
| <U1–O>                   | 2.34       |                       |              |                |
| O1–O2                    | 2.804(7)   | O2–O3 <sup>ix</sup>   | 2.566(5)     |                |
| O1–O2 <sup>vi</sup>      | 2.512(7)   | O2–O3 <sup>iv</sup>   | 2.980(6)     |                |
| O1–O3                    | 2.487(5)   | O3–O3 <sup>x</sup>    | 2.674(4)     |                |
| O1–O3 <sup>vii</sup>     | 2.487(5)   | O3–O3 <sup>vii</sup>  | 2.390(4)     |                |
| O1–O4                    | 2.682(8)   | O3–O4 <sup>viii</sup> | 2.827(6)     |                |
| O2–O3 <sup>i</sup>       | 2.980(6)   | O4–O4 <sup>v</sup>    | 2.523(10)    |                |
| O2–O3 <sup>viii</sup>    | 2.566(5)   |                       |              |                |
| <i>D–H...A</i>           | <i>D–H</i> | <i>H...A</i>          | <i>D...A</i> | <i>D–H...A</i> |
| O4–H1...O2 <sup>vi</sup> | 0.812(7)   | 2.492(6)              | 3.300(9)     | 173.0(4)       |

Symmetry codes: (i)  $-x+2, -y+3/2, z-1/2$ ; (ii)  $-x+3/2, y, -z+1/2$ ; (iii)  $x+1/2, y, -z+1/2$ ; (iv)  $x, -y+3/2, z-1/2$ ; (v)  $x, -y+1, -z$ ; (vi)  $-x+2, y-1/2, -z+1/2$ ; (vii)  $-x+2, y, z$ ; (viii)  $-x+2, y+1/2, -z+1/2$ ; (ix)  $x, y+1/2, -z+1/2$ ; (x)  $-x+3/2, -y+3/2, -z+1$ .

**Supplementary table S4a.** Hydrogen-bond geometry in the structure of vyacheslavite as obtained from DFT. Positions and lattice were fixed at the experimental parameters (obtained from PED data at 100K), except for hydroxyl hydrogen which were relaxed to its ground state.

**DFT+U**

|                            |            |              |              |                |
|----------------------------|------------|--------------|--------------|----------------|
| <i>D–H...A</i>             | <i>D–H</i> | <i>H...A</i> | <i>D...A</i> | <i>D–H...A</i> |
| O4–H1...O2 <sup>vi</sup>   | 0.973      | 2.420        | 3.322        | 153.9          |
| O4–H1...O1                 | 0.973      | 2.444        | 2.692        | 93.9           |
| O4–H1...O1 <sup>xii</sup>  | 0.973      | 2.449        | 3.208        | 134.6          |
| O4–H1...O3 <sup>xii</sup>  | 0.973      | 2.657        | 2.706        | 82.4           |
| O4–H1...O3 <sup>xiii</sup> | 0.973      | 2.657        | 2.706        | 82.4           |

Symmetry codes: (vi)  $-x+2, y-1/2, -z+1/2$ ; (xi)  $0,y,z$ ; (xii)  $x,y+1/2,-z+1/2$ ; (xiii)  $-x+1,y+1/2,-z+1/2$ .

**DFT+U+vdW**

|                            |            |              |              |                |
|----------------------------|------------|--------------|--------------|----------------|
| <i>D–H...A</i>             | <i>D–H</i> | <i>H...A</i> | <i>D...A</i> | <i>D–H...A</i> |
| O4–H1...O2 <sup>vi</sup>   | 0.977      | 2.417        | 3.322        | 153.8          |
| O4–H1...O1                 | 0.977      | 2.445        | 2.692        | 93.8           |
| O4–H1...O1 <sup>xii</sup>  | 0.977      | 2.445        | 3.208        | 134.6          |
| O4–H1...O3 <sup>xii</sup>  | 0.977      | 2.657        | 2.706        | 82.4           |
| O4–H1...O3 <sup>xiii</sup> | 0.977      | 2.657        | 2.706        | 82.4           |

Symmetry codes: (vi)  $-x+2, y-1/2, -z+1/2$ ; (xi)  $0,y,z$ ; (xii)  $x, y+1/2, -z+1/2$ ; (xiii)  $-x+1, y+1/2, -z+1/2$ .

**Supplementary table S4b.** Selected interatomic distances (in Å) and hydrogen bond geometry in the structure of vyacheslavite. Symmetry constraint relaxation of all atomic positions for fixed experimental lattice at the DFT+U level of theory.

**DFT+U**

| $D-H\cdots A$                     | $D-H$ | $H\cdots A$ | $D\cdots A$ | $D-H\cdots A$ |
|-----------------------------------|-------|-------------|-------------|---------------|
| O4-H1 $\cdots$ O2 <sup>vi</sup>   | 0.981 | 2.141       | 3.048       | 153.1         |
| O4-H1 $\cdots$ O1                 | 0.981 | 2.617       | 2.807       | 90.8          |
| O4-H1 $\cdots$ O1 <sup>xii</sup>  | 0.981 | 2.221       | 2.996       | 135.0         |
| O4-H1 $\cdots$ O3 <sup>xii</sup>  | 0.981 | 2.833       | 2.856       | 81.4          |
| O4-H1 $\cdots$ O3 <sup>xiii</sup> | 0.981 | 2.833       | 2.856       | 81.4          |

(xi)  $0,y,z$ ; (xii)  $x,y+1/2,-z+1/2$ ; (xiii)  $-x+1,y+1/2,-z+1/2$ .
